# Supplementary material for: Complementary roles of different oscillatory activities in the subthalamic nucleus in coding motor effort in Parkinsonism
Source: PubMed Central journal article supplement — Exp Neurol. 2013 Oct;248:187–95. doi: 10.1016/j.expneurol.2013.06.010 (PMC3972632; doi:10.1016/j.expneurol.2013.06.010), 2013-10
Supplement: mmc2.pdf [file mmc2.pdf]

# RPE Scale

rating of perceived exertion

| rating | description              |
|--------|--------------------------|
| 0      | NOTHING AT ALL           |
| 0.5    | VERY, VERY LIGHT         |
| 1      | VERY LIGHT               |
| 2      | FAIRLY LIGHT             |
| 3      | MODERATE                 |
| 4      | SOMEWHAT HARD            |
| 5      | HARD                     |
| 6      |                          |
| 7      | VERY HARD                |
| 8      |                          |
| 9      |                          |
| 10     | VERY VERY HARD (MAXIMAL) |
